# Supplementary material for: Cycling hypoxia affects cell invasion and proliferation through direct regulation of claudin1 / claudin7 expression, and indirect regulation of P18 through claudin7
Source: PubMed Central journal article supplement (PMC5354660; doi:10.18632/oncotarget.14397), 2016-12-31
Supplement: oncotarget-08-10298-s001.pdf [file oncotarget-08-10298-s001.pdf]

# Cycling hypoxia affects cell invasion and proliferation through direct regulation of claudin1 / claudin7 expression, and indirect regulation of P18 through claudin7

## SUPPLEMENTARY FIGURE

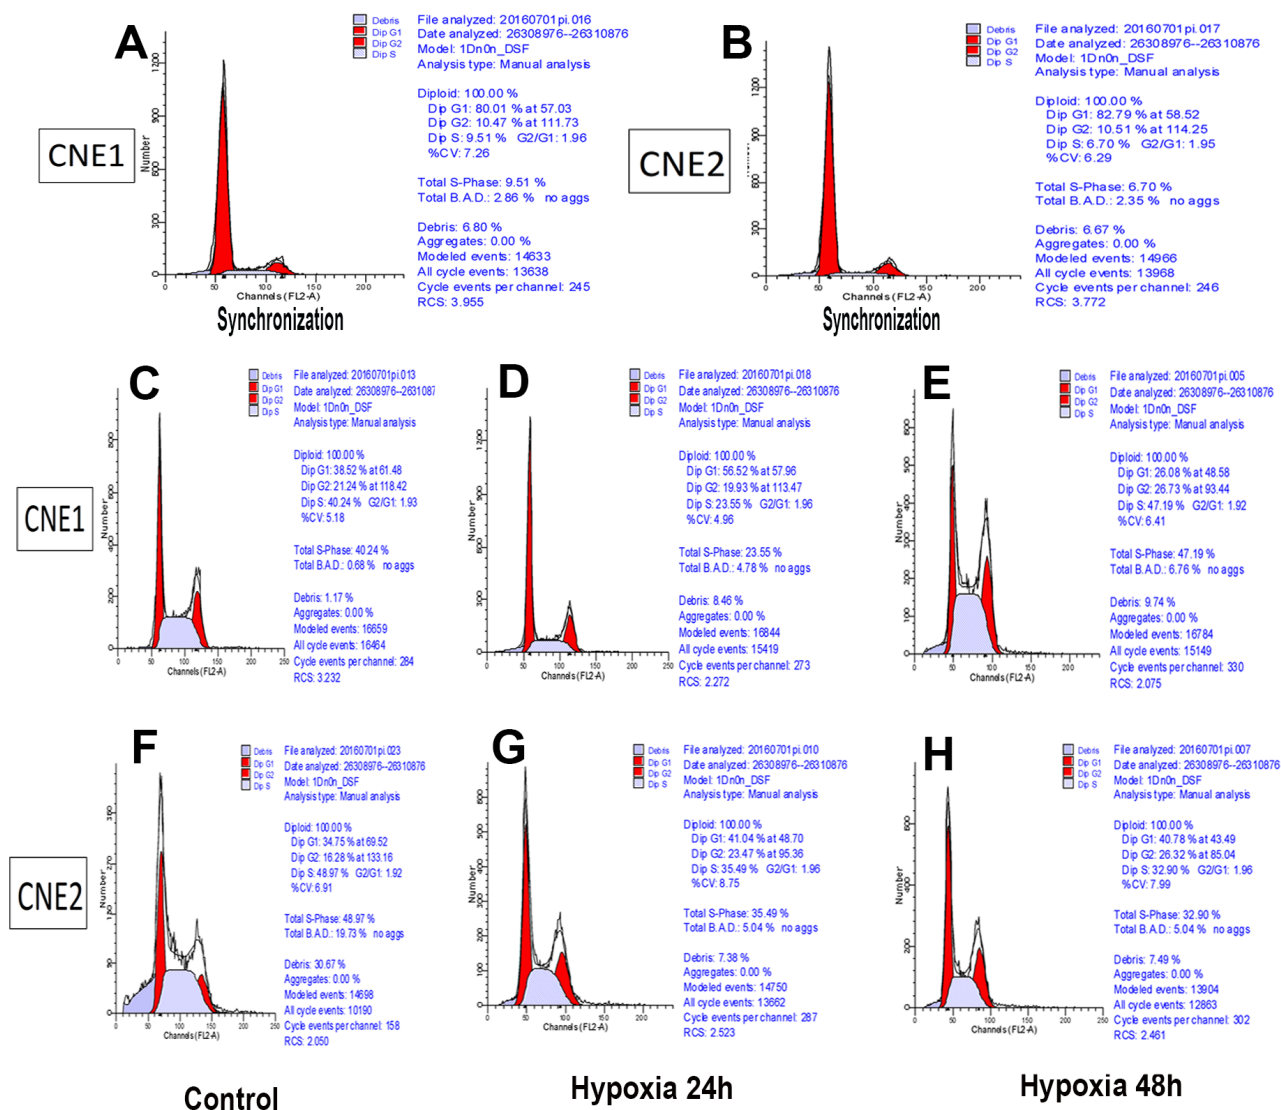

**Supplementary Figure 1: The results of the flow cell cycle.** A & B. are synchronized CNE1 & CNE2 cells, which showed an obvious arrest at G1 phase compared with the control cells, As shown in C-E., the fraction of cells in S phase was increased in CNE1 cells, and F-H. show that CNE2 cells were arrested at G1, which was consistent with the pattern of P18 changes.
